# Supplementary material for: Synthesis of poly(ethyl acrylate-co-allyl acrylates) from acrylate mixtures prepared by a continuous solvent-free enzymatic process
Source: Royal Society of Chemistry journal article supplement (doi:10.1039/c2ra21503a), 2012-01-01

Supplementary Material (ESI) for RCS Advances

This journal is (c) The Royal Society of Chemistry 2012

## † Electronic Supporting information

### Synthesis of poly(ethyl acrylate-co-allyl acrylates) from a acrylate mixtures prepared by a continuous solvent-free enzymatic process

Yara-Varón, Edinson;<sup>a</sup> Eras Joli, Jordi <sup>a</sup>; Balcells, Mercè <sup>a</sup>; Torres, Mercè<sup>b</sup> and Canela, Ramón<sup>\*a,b</sup>

<sup>a</sup> Department of Chemistry, <sup>b</sup> Department of Science Food Technology, Lleida University, ETSEA, Av. Rovira Roure 191, 25198, Lleida, Spain. E-mail: canela@quimica.udl.cat; Fax: +34 973238264; Tel: +34 973702843.

**Figure 1S** Flow continuous system

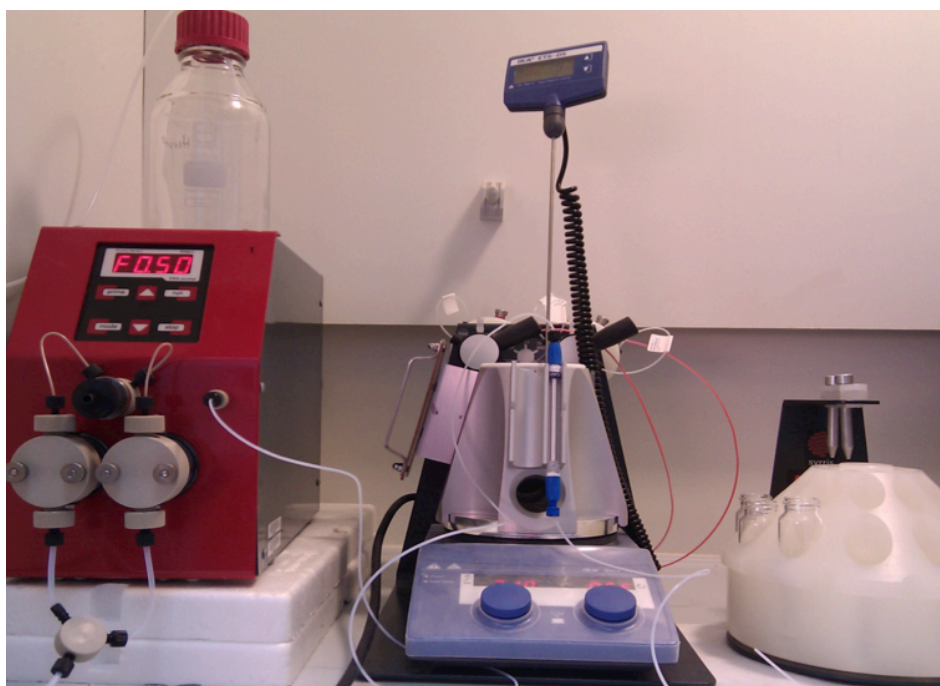

**Figure 2S** Column reactor packed with CALB.

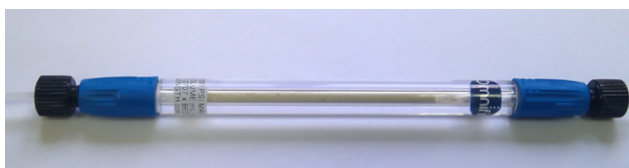

**Figure 3S**  $^1\text{H}$  NMR analysis of co-polymer A by bulk polymerization.

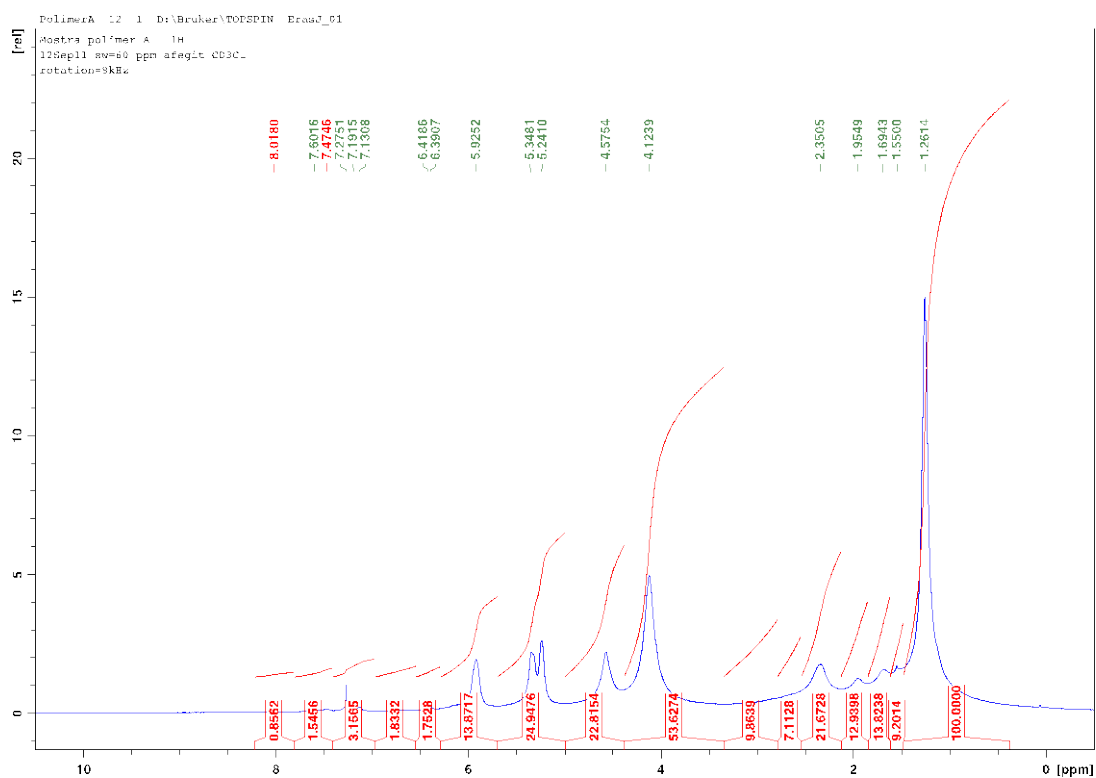

**Figure 4S**  $^1\text{H}$  NMR analysis of co-polymer B by bulk polymerization.

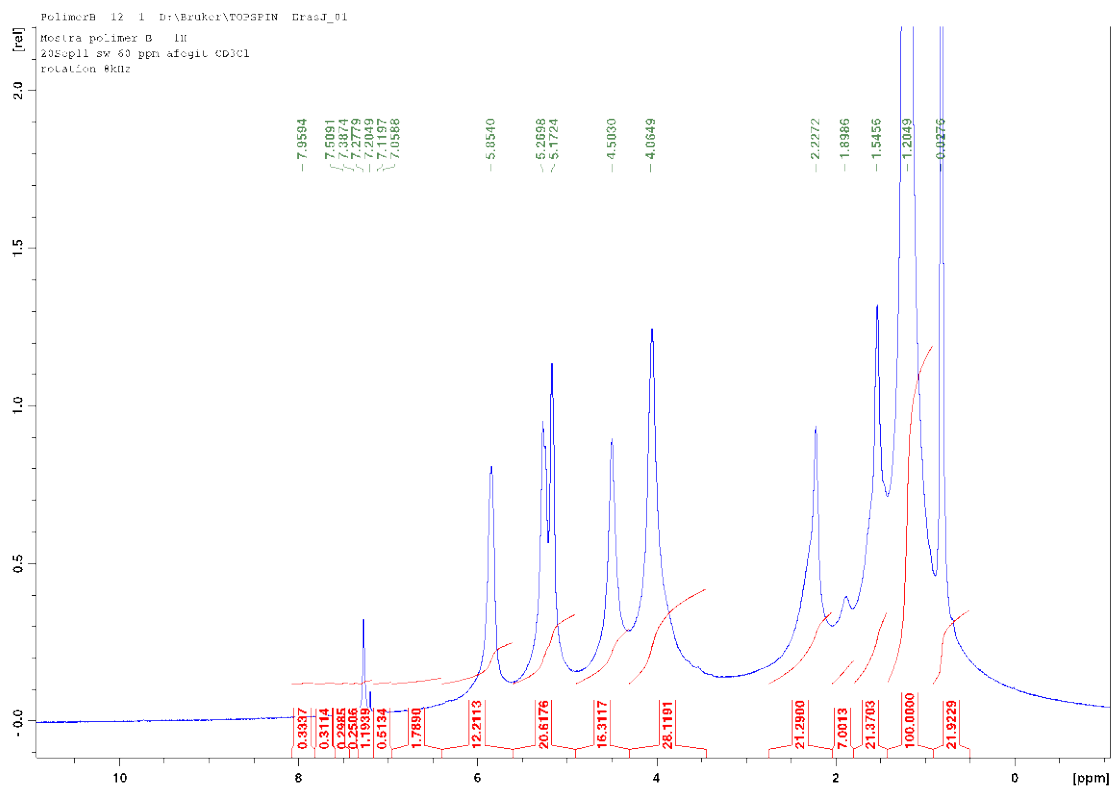

Supplement: c2ra21503a.pdf [file c2ra21503a.pdf]
